# Supplementary material
Source: PubMed Central journal article supplement (PMC4302926)
Supplement: supp_141.23.4468_DEV113969supp.pdf [file supp_141.23.4468_DEV113969supp.pdf]

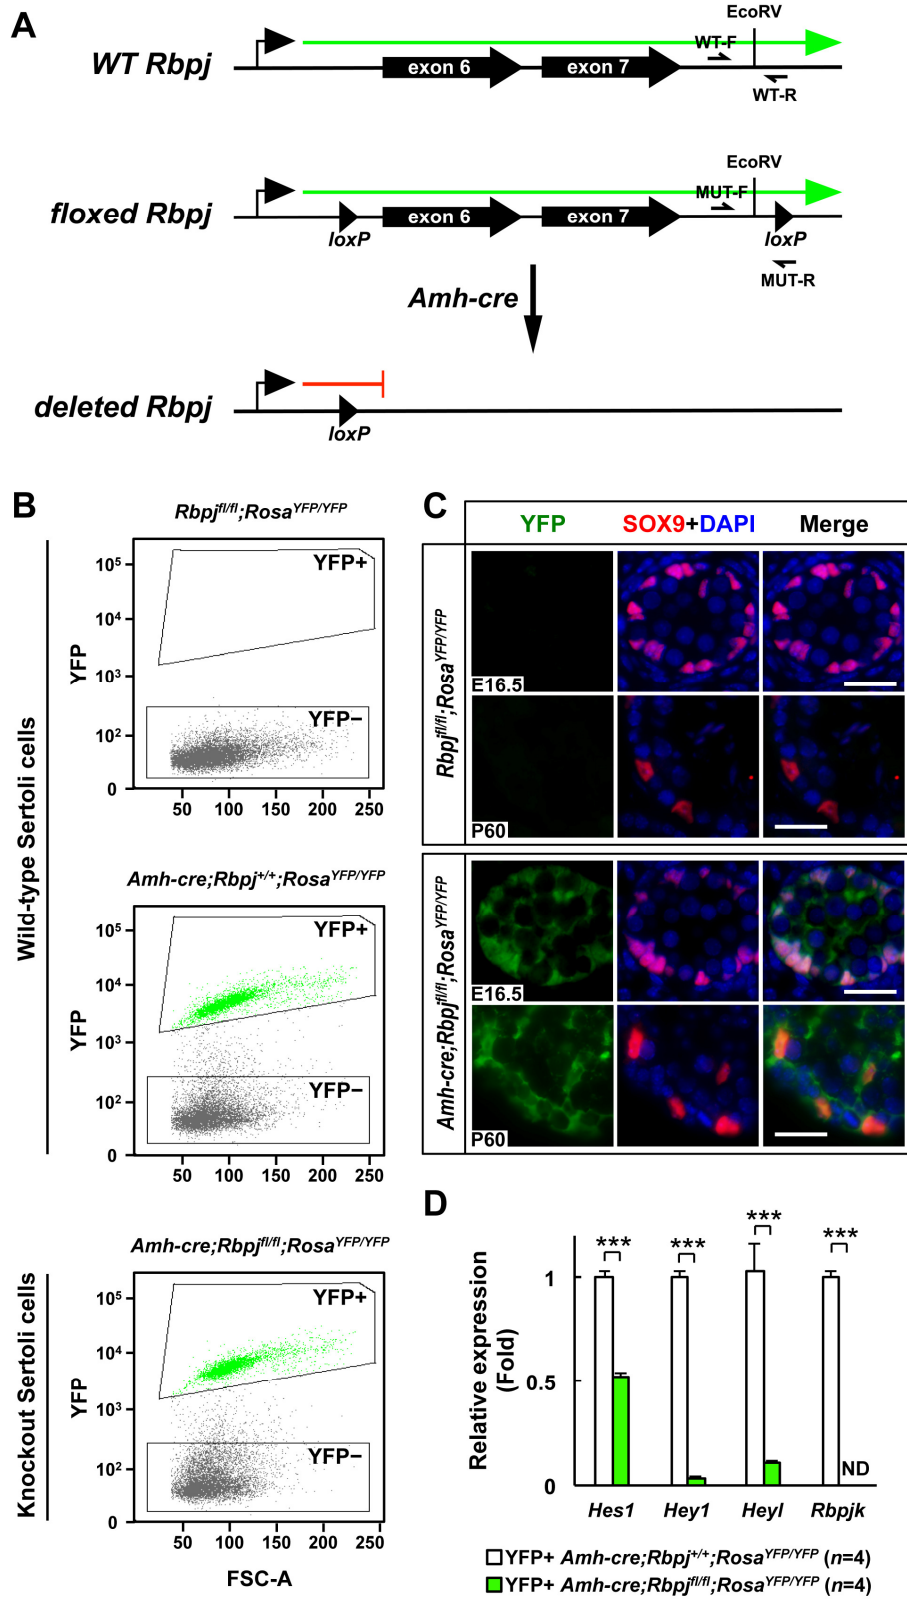

**Supplementary Figure 1. Ablation of *Rbpj* gene function in Sertoli cells.** **(A)** Schematic representation of exons 6 and 7 of the mouse *Rbpj* gene, highlighting the position of the loxP sites in the floxed animal, and the position of the wild-type and mutant primers used for genotyping ear/tail tissue as well as FACS-sorted cells. **(B)** Representative flow-cytometry profiles of wild-type and knockout Sertoli cells expressing yellow fluorescent protein (YFP) from introduction of the Cre-dependent *Rosa<sup>YFP</sup>* allele and used for fluorescence-activated cell sorting (FACS). **(C)** Representative tubule cross-sections from embryonic and postnatal control and knockout testes stained for YFP, SOX9 (Sertoli cell marker), and DAPI (DNA marker) showing Cre-mediated expression of YFP in Sertoli cells. **(D)** Real-time PCR analysis of YFP+ Sertoli cells isolated through FACS showing ablation of *Rbpj* transcripts and significant reductions in the expression of the canonical Notch target genes, *Hes1*, *Hey1*, and *Heyl* in knockout Sertoli cells relative to wild-type Sertoli cells. \*\*\* $P < 0.005$ . Scale bar = 100  $\mu\text{m}$ .

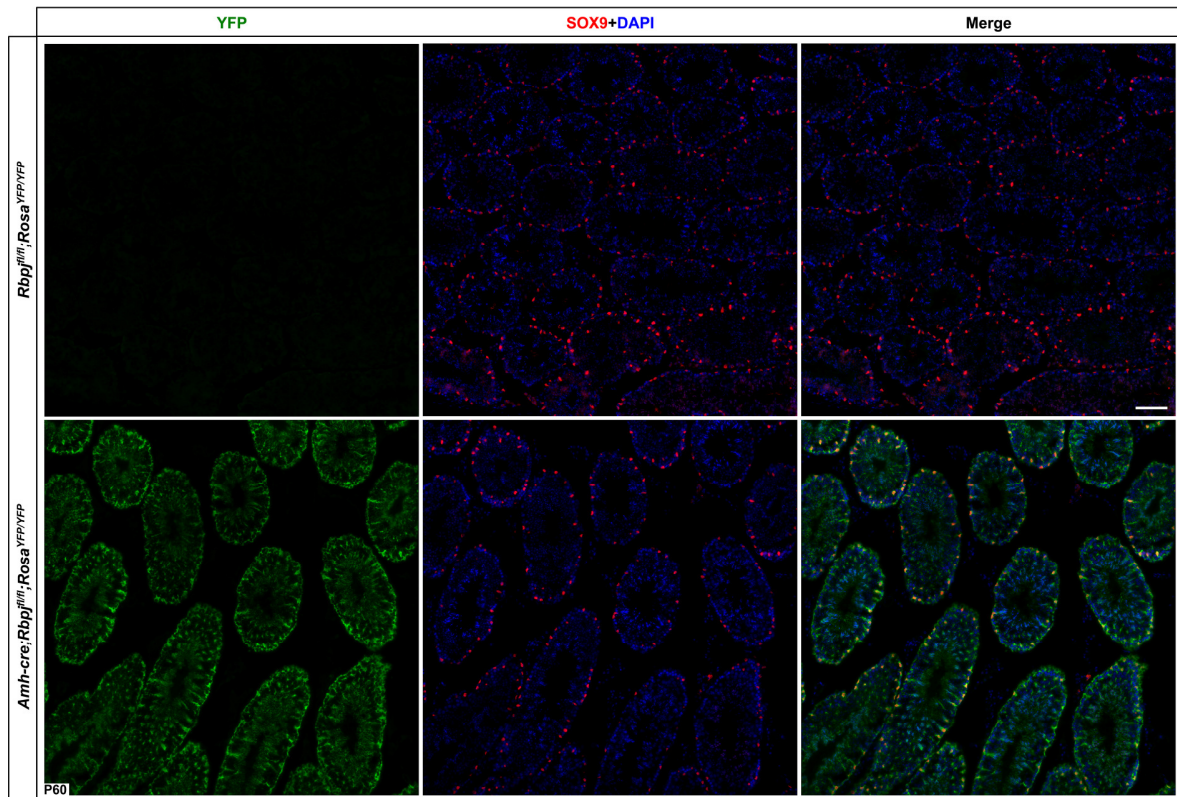

**Supplementary Figure 2. YFP staining of *Amh-cre;Rbpj<sup>fl/fl</sup>;Rosa<sup>YFP/YFP</sup>* sections show classic Sertoli cell cytoplasm staining pattern.** Immunofluorescence images of *Rbpj<sup>fl/fl</sup>;Rosa<sup>YFP/YFP</sup>* and *Amh-cre;Rbpj<sup>fl/fl</sup>;Rosa<sup>YFP/YFP</sup>* testis sections at P60 as indicated. YFP (green), SOX9 (red), and DAPI (blue). Scale bars represent 100  $\mu\text{m}$ .

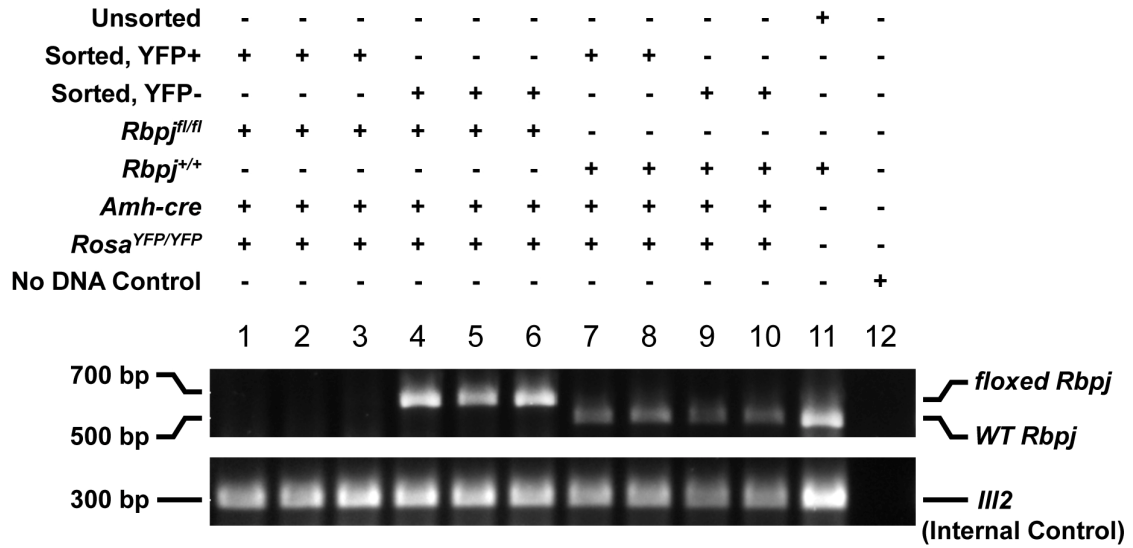

**Supplementary Figure 3. Complete deletion of *Rbpj* floxed exons in mice containing**

**the *Amh-cre* transgene.** Genotyping as performed on ear and tail tissue for routine

identification of mice was carried out on FACS sorted cells to determine efficiency of Cre-

mediated recombination of floxed-*Rbpj*. Neither floxed nor WT alleles could be detected in

YFP+ cells derived *Rbpj<sup>SKO</sup>* mice demonstrating 100% recombination of the floxed allele.

Results are given as means  $\pm$  standard error of the mean.

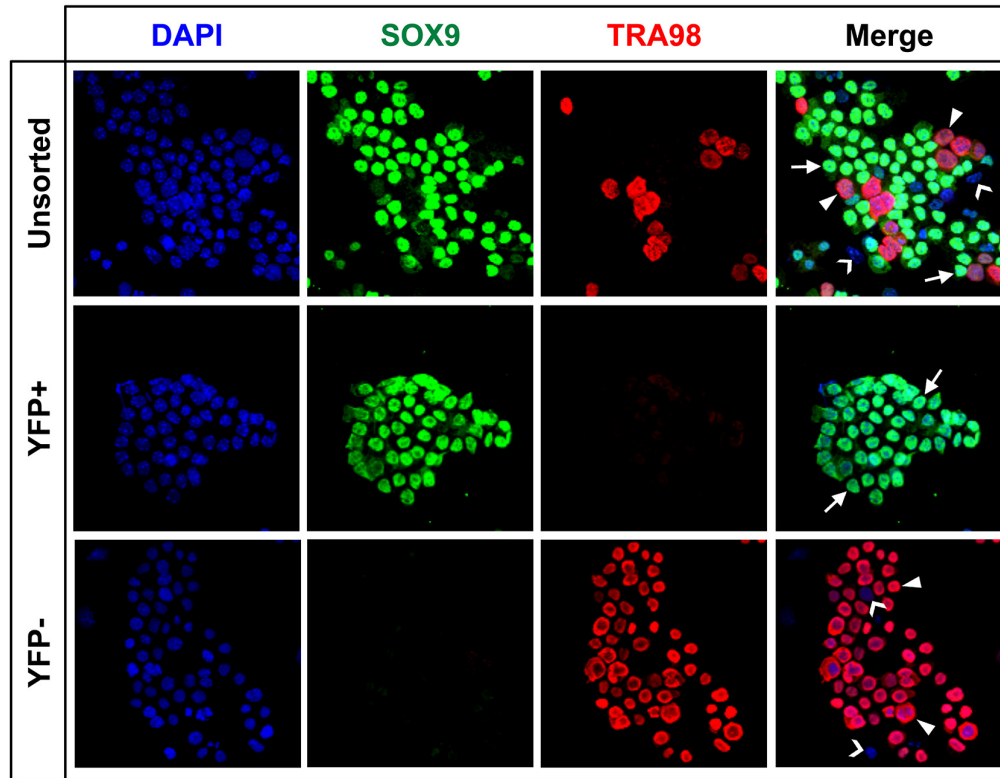

**Supplementary Figure 4. Fluorescence-activated cell sorting of mice containing *Amh-cre* and *Rosa<sup>YFP</sup>* transgenes yields pure populations of YFP+ Sertoli cells.**

Immunocytochemistry was performed on unsorted (input) cells and YFP+ and YFP- (output) cells as isolated through FACS. After FACS, cells were adhered to microscope slides by cytocentrifugation, stained with the indicated primary antibodies, and then visualized through confocal microscopy with equivalent exposure levels set for like channels. Whereas unsorted cells contain a mix of DAPI+/SOX9+/TRA98- (Sertoli) cells, DAPI+/SOX9-/TRA98+ (germ) cells, and DAPI+/SOX9-/TRA98- (interstitial) cells, YFP+ cells contain DAPI+/SOX9+/TRA98- (Sertoli) cells only and YFP- cells contain a mix of DAPI+/SOX9-/TRA98+ (germ) cells and DAPI+/SOX9-/TRA98- (interstitial) cells. In the testis, SOX9 is widely accepted as a specific marker for Sertoli cells and TRA98 is widely accepted as a specific marker for germ cells. Therefore, YFP+ cells are Sertoli cells. Examples of Sertoli cells (arrows), germ cells (arrowheads), and interstitial cells (chevrons) as marked.

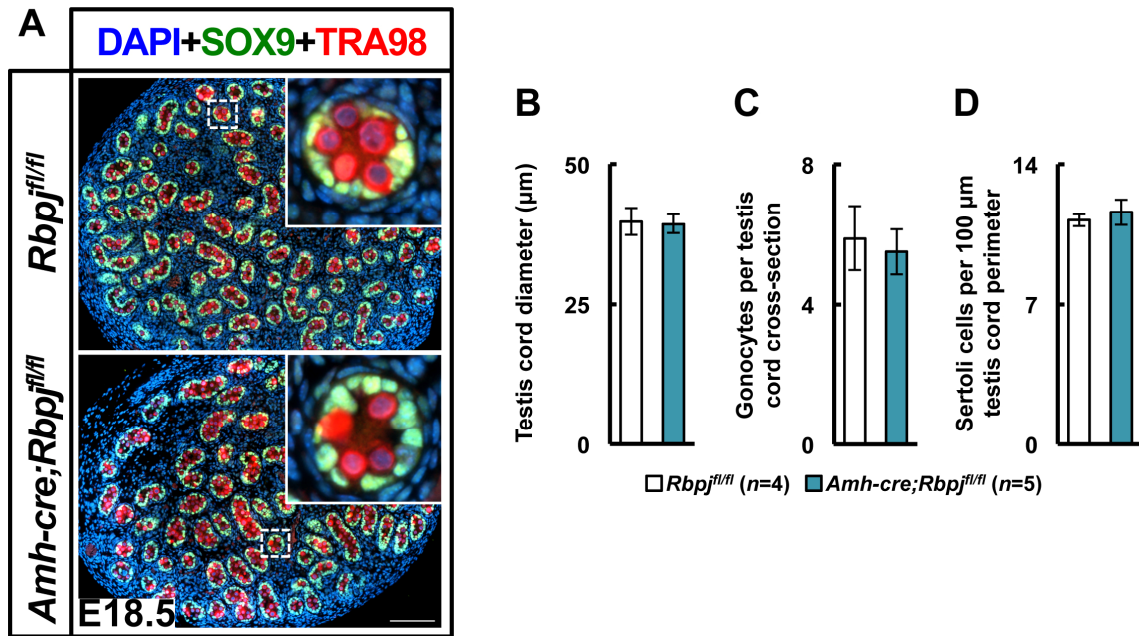

**Supplementary Figure 5. Testis cord diameters and germ cell and Sertoli cell numbers are not altered in embryonic *Rbpj*<sup>SCKO</sup> gonads.** (A) Representative Immunofluorescence images of control (*Rbpj*<sup>fl/fl</sup>) and *Rbpj*<sup>SCKO</sup> (*Amh-cre;Rbpj*<sup>fl/fl</sup>) gonad sections at E18.5. SOX9 (green), TRA98 (red), and DAPI (blue). Scale bars represent 100  $\mu\text{m}$ . (B-D) In total, 252 circular cord cross-sections were evaluated, with an average of 14 circular cord cross-sections evaluated per gonad cross-section. Two gonad cross-sections were evaluated per fetus with one gonad cross-section coming from one gonad and the other gonad cross-section coming from the contralateral gonad. The average values (circular cord cross-section diameters, gonocytes per circular cord cross-section, and Sertoli cells per 100  $\mu\text{m}$  cord perimeter) from one gonad cross-section were averaged with the average values of the contralateral gonad cross-section to obtain a mean value per fetus. This was done with 4 control and 5 *Rbpj*<sup>SCKO</sup> fetuses to obtain the final means and standard error of the means depicted in the graphs (B-D).

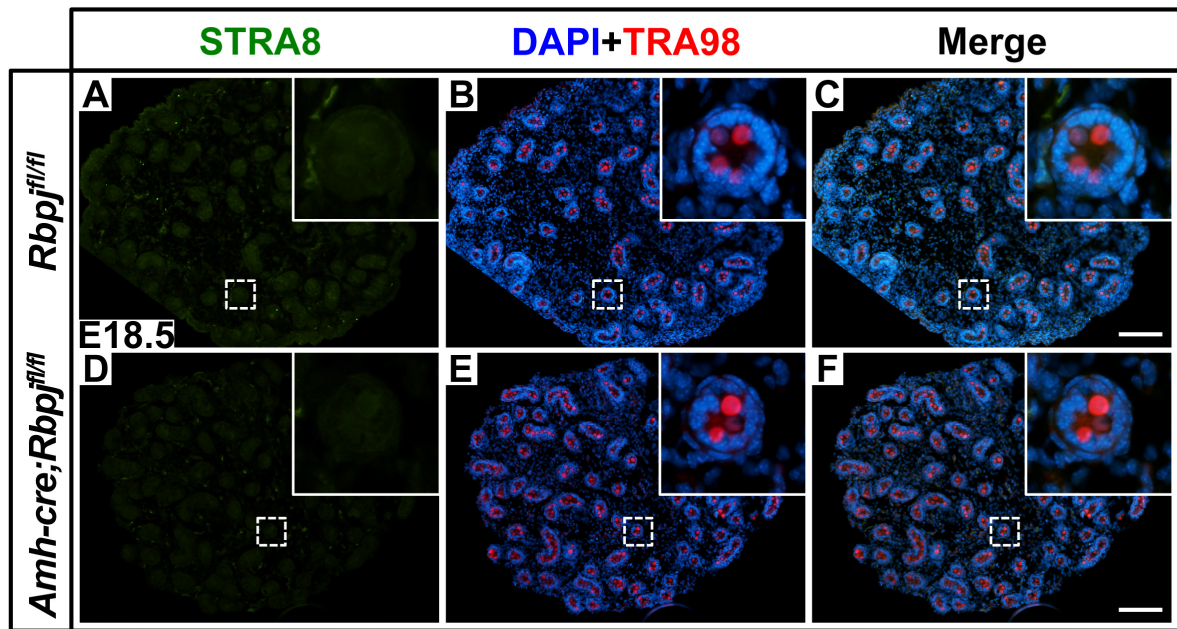

**Supplementary Figure 6. *Rbpj*<sup>SCKO</sup> gonocytes do not express the meiosis entry marker, STRA8, indicating appropriate maintenance in an undifferentiated state. (A-F)** Immunofluorescence images of *Rbpj*<sup>fl/fl</sup> (A-C) and *Amh-cre;Rbpj*<sup>fl/fl</sup> (D-F) gonad sections at E18.5. STRA8 (green), TRA98 (red), and DAPI (blue). Scale bars represent 100  $\mu$ m.

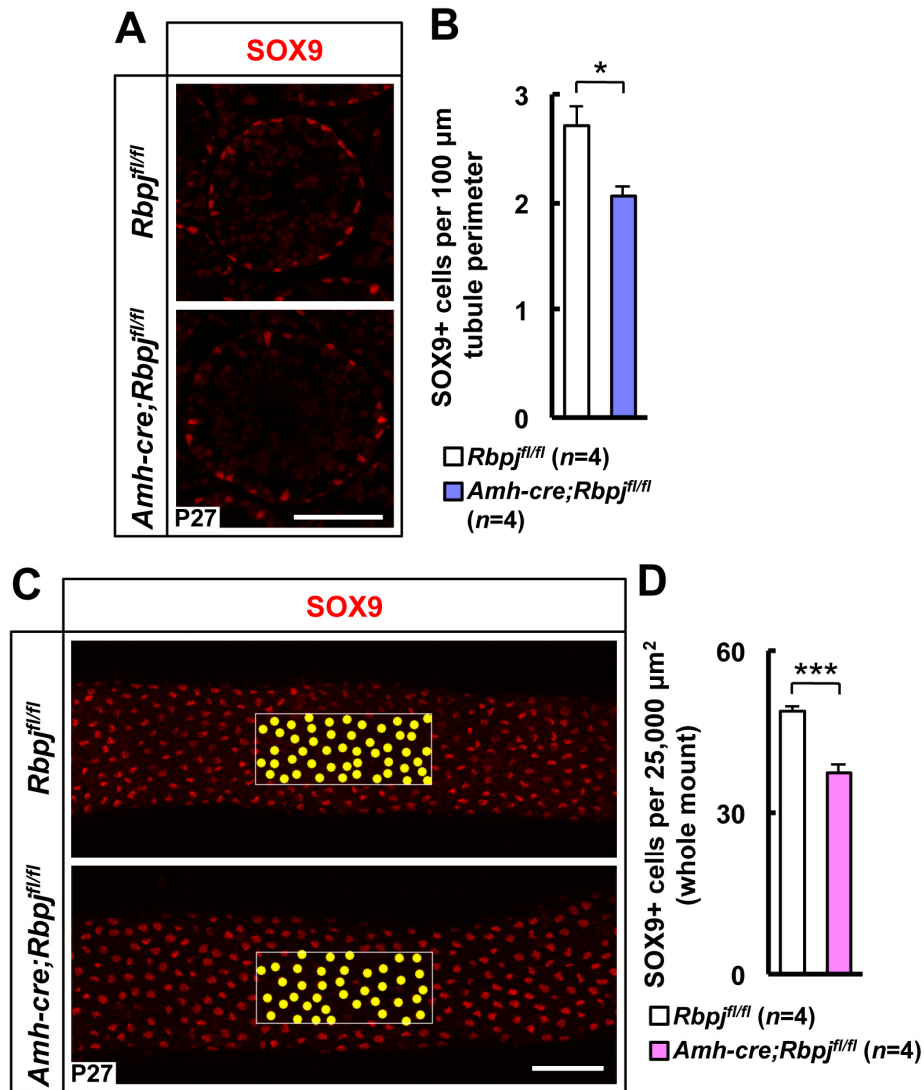

**Supplementary Figure 7. Sertoli cells density is lower in *Rbpj*<sup>SCKO</sup> mouse testes at postnatal day 27. (A)** Representative tubule cross-sections from control and knockout testes stained for SOX9 (Sertoli cell marker). **(B)** Quantification of the number of SOX9+ Sertoli cells per 100  $\mu\text{m}$  tubule perimeter. **(C)** In a representative example of anti-SOX9 antibody whole-mount staining of control and knockout tubules, yellow dots highlight individual Sertoli (SOX9+) cells within a 25,000- $\mu\text{m}^2$  (100  $\mu\text{m}$   $\times$  250  $\mu\text{m}$ ) tubule outer area. **(D)** Quantification of the number of SOX9+ Sertoli cells per 25,000  $\mu\text{m}^2$ . Results are given as means  $\pm$  standard error of the mean. \* $P$ <0.05 and \*\*\* $P$ <0.005. Scale bar = 100  $\mu\text{m}$ .



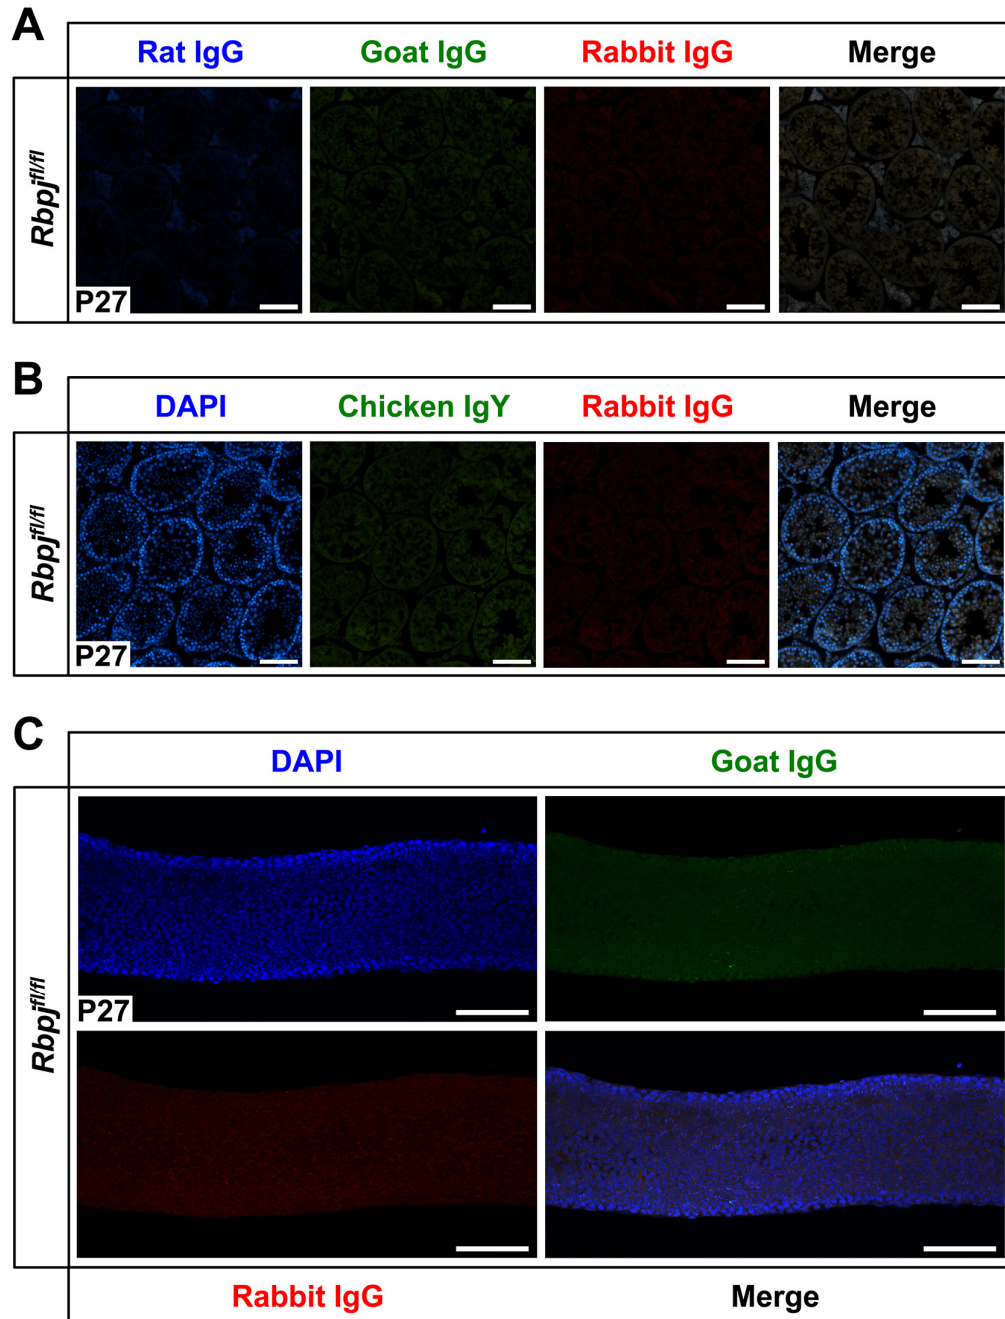

**Supplementary Figure 8. Representative immunohistochemistry and whole mount staining with isotype control antibodies. (A-B)** Postnatal day 27 testis sections from *Rbpj<sup>fl/fl</sup>; Rosa<sup>YFP/YFP</sup>* control mice were incubated with the indicated isotype control IgGs, each at the highest concentration any target-specific primary antibody was used at during the study. For example, for immunohistochemistry, goat anti-GFRA1, goat anti-PLZF, and goat anti-JAG1 antibodies were used at 1:500, 1:500, and 1:75, respectively, which corresponded

to concentrations of 2.0, 0.4, and 13.3 µg/ml, respectively. Therefore, as control, non-specific goat IgG antibodies were used at a concentration of 13.3 µg/ml. Similarly, chicken, rabbit, and rat isotype control IgG antibodies were used at 10.0, 2.0, and 4.0 µg/ml, respectively. **(C)** Isotype control whole mount staining of postnatal day 27 seminiferous tubules from *Rbpj<sup>fl/fl</sup>;Rosa<sup>YFP/YFP</sup>* control mice. Since target-specific primary antibodies—rabbit anti-SOX9 and goat anti-GFRA1—were each used at 1:200 dilutions, corresponding to 5 µg/ml each, rabbit and goat isotype control antibodies were also used at 5 µg/ml. Scale bars = 100 µm.

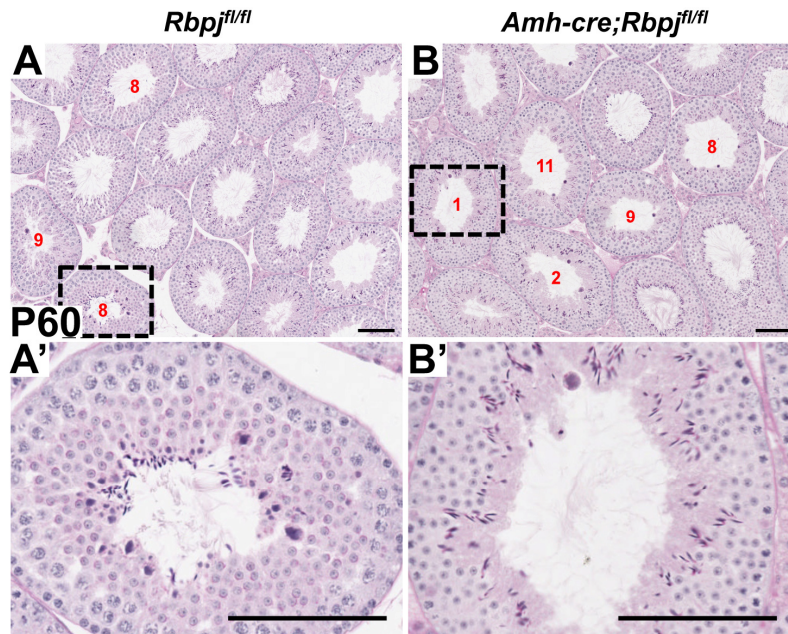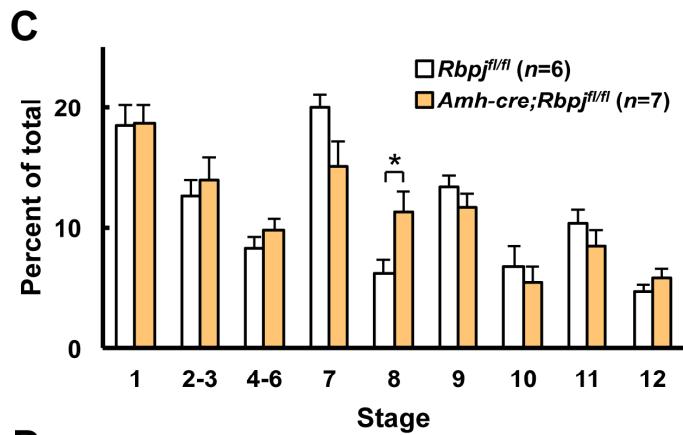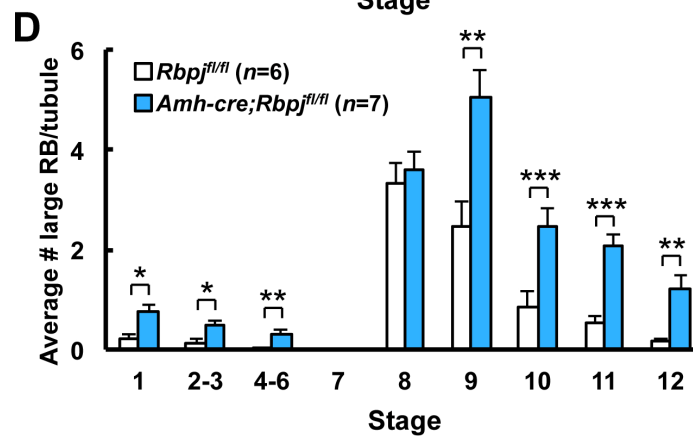

**Supplementary Figure 9. The number of large, luminal residual bodies is increased at all stages of spermatogenesis in the non-atrophic knockout testes.** Representative periodic acid–Schiff staining of control **(A)** and non–atrophic knockout **(B)** mouse testes. Residual bodies are normally present during stages 8 and 9 of spermatogenesis. **(A'–B')** Higher magnification insets of A–B **(C)** Quantification of stages of spermatogenesis at P60 shows no gross alterations in the distribution of stages I through XII, except for a significant increase in the percentage of stage VIII tubules. **(D)** Stage-specific quantification of the mean number of large, luminal residual bodies (LLRBs) per tubule showing LLRBs are significantly increased at all stages of spermatogenesis.

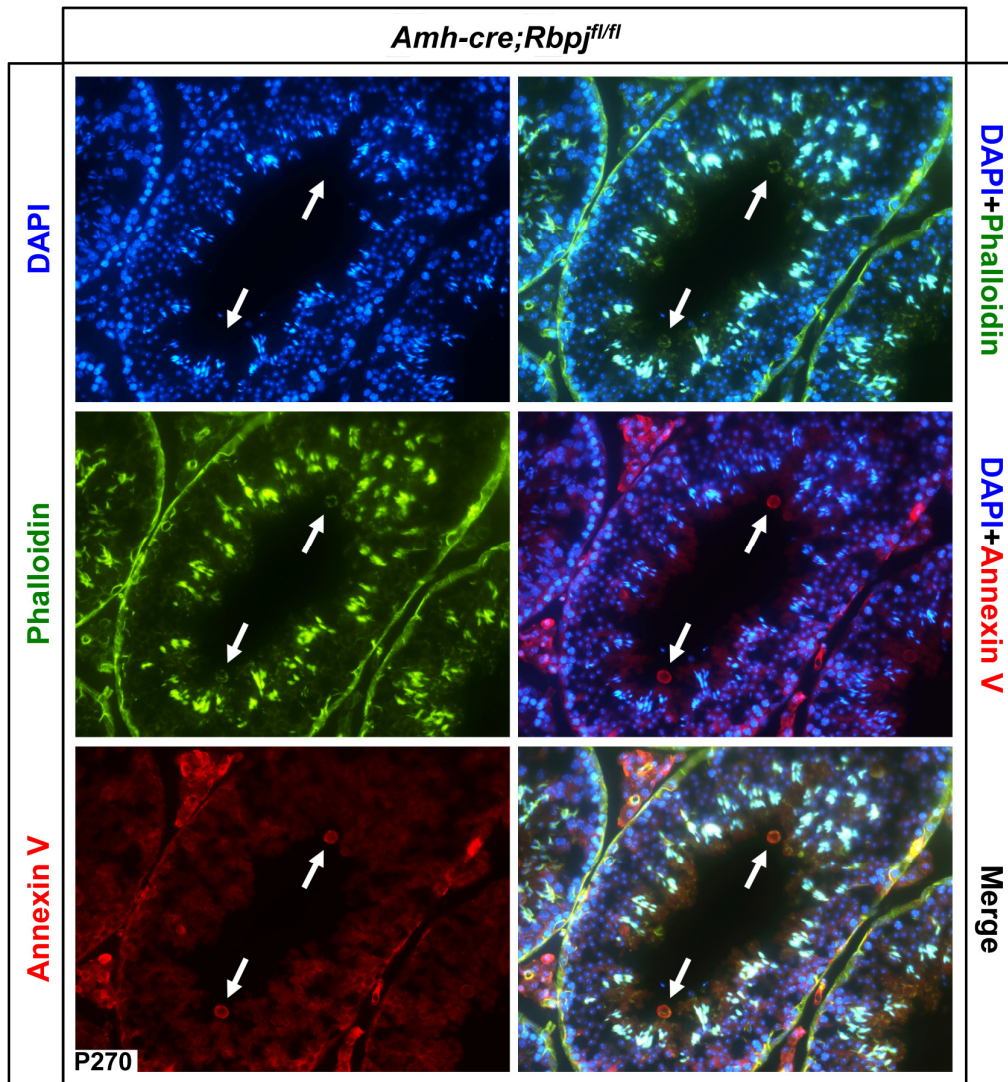

**Supplementary Figure 10. Excess intraluminal debris is likely excess residual bodies.**

(A) Staining with DAPI, anti-Annexin V, and Phalloidin confirming that spherical, intraluminal objects are devoid of nucleic acid, yet express the residual body markers consistent with their identity as residual bodies, or residual body-like extracytoplasmic debris. The arrows show representative residual bodies.

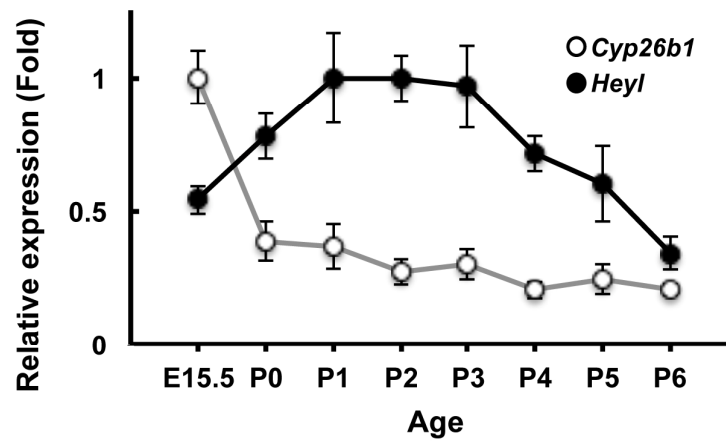

**Supplementary Figure 11. *Heyl* and *Cyp26b1* transcript levels are inversely related in Sertoli cells in the perinatal testis.** Perinatal gene expression analysis of pure GFP+ FACS-sorted Sertoli cells from *Amh-cre;Rosa<sup>mTmG/+</sup>* showing an inverse relationship between *Heyl* and *Cyp26b1* expression.

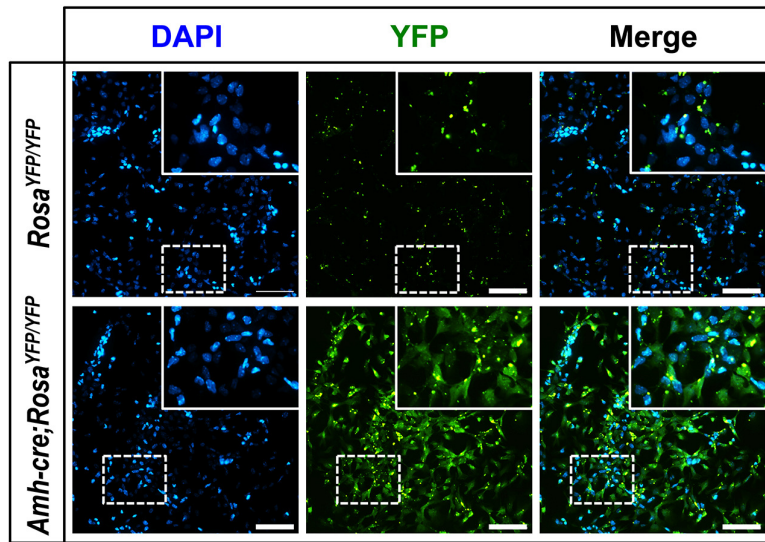

**Supplementary Figure 12. Cytoplasmic expression of YFP in Sertoli cells cultured from mice containing *Amh-cre* and *Rosa*<sup>YFP/YFP</sup> transgenes.** Primary isolated testicular cells from neonatal pups of the indicated genotypes were cultured for 3-5 days under growth conditions selective for Sertoli cells (as previously described), and then passaged into wells of Lab-Tek II Chamber Slides for further culture for 1-3 days. Prior to widefield fluorescence microscopy imaging, cells were washed with PBS, fixed with 4% paraformaldehyde, washed again, then coverslipped with an application of ProLong Gold with DAPI. *Amh-cre* transgene expression is specific to Sertoli cells, and YFP protein expression and fluorescence from *Rosa*<sup>YFP</sup> occurs only in the presence of Cre-mediated recombination. Whereas cultured cells from *Rosa*<sup>YFP/YFP</sup> and *Amh-cre;Rosa*<sup>YFP/YFP</sup> mice both show small, punctate, non-specific fluorescence, only Sertoli cells from *Amh-cre;Rosa*<sup>YFP/YFP</sup> mice show cytoplasmic YFP fluorescence, verifying that greater than 95% of the cells in culture, under these culture conditions, are indeed Sertoli cells. Scale bar = 100  $\mu$ m.

**Table S1. Fertility of male mice over a 6 month period beginning at 2 months of age**

|                                     | Number of males tested | Average no. of litters | Average no. of male pups per litter | Average no. of female pups per litter |
|-------------------------------------|------------------------|------------------------|-------------------------------------|---------------------------------------|
| <i>Rbpj<sup>fl/fl</sup></i>         | 9                      | 5.56±0.53              | 5.47±0.50                           | 4.36±0.40                             |
| <i>Amh-cre;Rbpj<sup>fl/fl</sup></i> | 9                      | 5.44±0.75              | 4.23±0.39                           | 4.40±0.44                             |
| <i>P</i> -value                     |                        | 0.905                  | 0.0678                              | 0.948                                 |

One male was paired with one wild-type female for 6 months. *N* (male) = 9/group. If female failed to produce a litter after one full breeding cycle, she was replaced with a new virgin female. No statistically significant changes were observed between groups or over time throughout the duration of the study.



**Table S2. Genotyping primers**

|                                   |                                   |
|-----------------------------------|-----------------------------------|
| <b><i>Amh-cre</i></b>             |                                   |
| GCG GTC TGG CAG TAA AAA CTA TC    | Transgene                         |
| GTG AAA CAG CAT TGC TGT CAC TT    | Transgene                         |
| CTA GGC CAC AGA ATT GAA AGA TCT   | Internal Positive Control Forward |
| GTA GGT GGA AAT TCT AGC ATC ATC C | Internal Positive Control Reverse |
| <b><i>Vasa-cre</i></b>            |                                   |
| CAC GTG CAG CCG TTT AAG CCG CGT   | Transgene Forward                 |
| TTC CCA TTC TAA ACA ACA CCC TGA A | Transgene Reverse                 |
| CTA GGC CAC AGA ATT GAA AGA TCT   | Internal Positive Control Forward |
| GTA GGT GGA AAT TCT AGC ATC ATC C | Internal Positive Control Reverse |
| <b><i>Rbpj<sup>fl</sup></i></b>   |                                   |
| GAAGGTCGGTTGACACCAGATAGC          | Mutant Forward                    |
| GCAATCCATCTTGTTC AATGGCC          | Mutant Reverse                    |
| GTTCTTAACCTGTTGGTCGGAACC          | Wild type Forward                 |
| GCTTGAGGCTTGATGTTCTGTATTGC        | Wild type Reverse                 |
| <b><i>Rosa<sup>YFP</sup></i></b>  |                                   |
| AAG ACC GCG AAG AGT TTG TC        | Mutant                            |
| AAA GTC GCT CTG AGT TGT TAT       | Common                            |
| GGA GCG GGA GAA ATG GAT ATG       | Wild type                         |
| <b><i>Rosa<sup>NICD</sup></i></b> |                                   |
| AAA GTC GCT CTG AGT TGT TAT       | Mutant Forward                    |
| GAA AGA CCG CGA AGA GTT TG        | Mutant Reverse                    |
| CCA AAG TCG CTC TGA GTT GTT ATC   | Wild type Forward                 |
| GAG CGG GAG AAA TGG ATA TG        | Wild type Reverse                 |
| <b><i>Rosa<sup>mTmG</sup></i></b> |                                   |
| CTC TGC TGC CTC CTG GCT TCT       | Wild type Forward                 |
| CGA GGC GGA TCA CAA GCA ATA       | Wild type Reverse                 |
| TCA ATG GGC GGG GGT CGT T         | Mutant Reverse                    |
| <b><i>TNR-GFP</i></b>             |                                   |
| AAG TTC ATC TGC ACC ACC G         | Transgene                         |
| TCC TTG AAG AAG ATG GTG CG        | Transgene                         |
| CTA GGC CAC AGA ATT GAA AGA TCT   | Internal Positive Control Forward |
| GTA GGT GGA AAT TCT AGC ATC ATC C | Internal Positive Control Reverse |

Table S3. Primary antibodies used for immunohistochemistry

| Primary Antibody | Host/isotype           | Dilution / Concentration | Source                 | Catalog Number                   |
|------------------|------------------------|--------------------------|------------------------|----------------------------------|
| anti-Annexin V   | Rabbit Polyclonal IgG  | 1:250 / 2.0 µg/ml        | Abcam                  | ab14196                          |
| anti-GFRA1       | Goat Polyclonal IgG    | 1:500 / 2.0 µg/ml        | Neuromics              | GT15004                          |
| anti-JAG1        | Goat Polyclonal IgG    | 1:75 / 13.3 µg/ml        | Neuromics              | GT15171                          |
| anti-PLZF        | Goat Polyclonal IgG    | 1:500 / 0.4 µg/ml        | R&D                    | AF2944                           |
| anti-SOX9        | Rabbit Polyclonal IgG  | 1:1000 / 1.0 µg/ml       | Millipore              | ab5535                           |
| anti-STRA8       | Rabbit Polyclonal IgG  | 1:1000 / 1.0 µg/ml       | Dr. Michael Griswold   | Zhou et al. 2008, PMID: 18032419 |
| anti-TRA98       | Rat Monoclonal IgG     | 1:250 / 4 µg/ml          | Abcam                  | ab82527                          |
| anti-YFP         | Chicken polyclonal IgY | 1:1000 / 10.0 µg/ml      | Abcam                  | ab13970                          |
| Isotype control  | Chicken polyclonal IgY | 10.0 µg/ml               | Jackson ImmunoResearch | 003-000-003                      |
| Isotype control  | Goat IgG               | 13.3 µg/ml               | Jackson ImmunoResearch | 005-000-003                      |
| Isotype control  | Rabbit IgG             | 2.0 µg/ml                | Jackson ImmunoResearch | 011-000-003                      |
| Isotype control  | Rat IgG                | 4.0 µg/ml                | Jackson ImmunoResearch | 012-000-003                      |

**Table S4. TaqMan probes used for real-time PCR**

| <b>Gene</b>                      | <b>Probe ID</b>     |
|----------------------------------|---------------------|
| <i>4933402E13Rik</i>             | Mm01306153_m1       |
| <i>Amh</i>                       | Mm03023963_m1       |
| <i>Cyp26b1</i>                   | Mm00558507_m1       |
| <i>Ddx4</i>                      | Mm00802445_m1       |
| <i>Dhh</i>                       | Mm01310203_m1       |
| <i>Dll1</i>                      | Mm01279269_m1       |
| <i>Dll3</i>                      | Mm00432854_m1       |
| <i>Dll4</i>                      | Mm00444619_m1       |
| <i>Edg7</i>                      | Mm00469694_m1       |
| <i>Eif3l</i> (housekeeping gene) | Mm00460859_m1       |
| <i>Gdnf</i>                      | Mm00599849_m1       |
| <i>Hes1</i>                      | Mm01342805_m1       |
| <i>Hey1</i>                      | Mm00468865_m1       |
| <i>Heyl</i>                      | Mm00516555_m1       |
| <i>Jag1</i>                      | Mm00496902_m1       |
| <i>Jag2</i>                      | Mm01325629_m1       |
| <i>Kitl</i>                      | Mm00442972_m1       |
| <i>Plzf</i>                      | Mm01176868_m1       |
| <i>Rbpj</i>                      | Mm.PT.56a.13401125* |
| <i>Rps3</i> (housekeeping gene)  | Mm00656272_m1       |
| <i>Sox9</i>                      | Mm00448840_m1       |
| <i>Vdr</i>                       | Mm00437297_m1       |
